# Supplementary material for: Effects of Epigenetic Modification and High Hydrostatic Pressure on Polyketide Synthase Genes and Secondary Metabolites of Alternaria alternata Derived from the Mariana Trench Sediments
Source: MDPI journal article supplement (doi:10.3390/md21110585), 2023-11-10
Supplement: s1 [file s1]

**Figure S1** Phenotypes of two strains of *A. alternata* isolated and cultured under different epigenetic modifiers. PDA was used as the base medium, different epigenetic modifiers were added and cultured at 28 °C for 14 days under the same conditions. Each group was repeated three times.

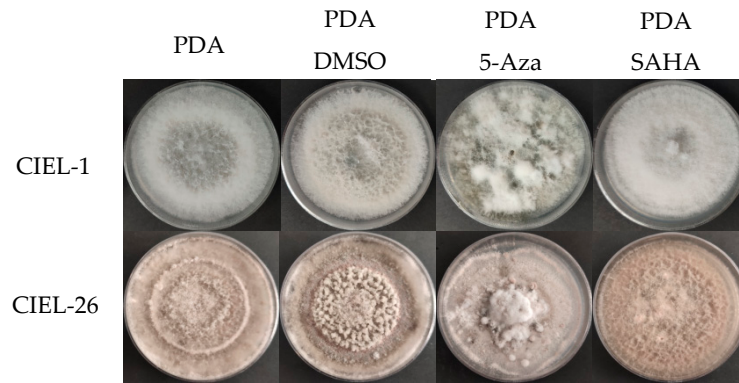



C

| No.   | Chemical formula                                                           | Compound                                                                                                                                  | Structure                                                                             |
|-------|----------------------------------------------------------------------------|-------------------------------------------------------------------------------------------------------------------------------------------|---------------------------------------------------------------------------------------|
| A1-1  | C <sub>12</sub> H <sub>21</sub> O <sub>5</sub> P                           | Bis(allyloxy)phosphinylacetic acid tert-butyl ester                                                                                       | 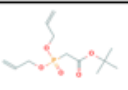   |
| A1-2  | C <sub>17</sub> H <sub>18</sub> O <sub>6</sub> S                           | Methyl (1R,4S,5R)-3-(benzothiophen-5-ylmethoxy)-1,4,5-trihydroxy-cyclohex-2-ene-1-carboxylate                                             |    |
| A1-3  | C <sub>17</sub> H <sub>14</sub> O <sub>5</sub> S                           | 3,4-Dimethyl-2-oxo-2H-1-benzopyran-7-yl benzenesulfonate                                                                                  |    |
| A1-4  | C <sub>6</sub> H <sub>15</sub> O <sub>12</sub> N <sub>5</sub>              | Not found                                                                                                                                 |                                                                                       |
| A1-5  | C <sub>19</sub> H <sub>20</sub> N <sub>3</sub> O <sub>2</sub> <sup>+</sup> | 10-[(2-Hydroxy-2-phenylethyl)amino]-7-methyl-2-aza-7-azoniatricyclo[6.3.1.0 <sup>4,12</sup> ]dodeca-1(11),2,4(12),7,9-pentaen-11-ol       |    |
| A1-6  | C <sub>18</sub> H <sub>23</sub> NO <sub>3</sub>                            | Dobutamine                                                                                                                                |    |
| A1-7  | C <sub>18</sub> H <sub>25</sub> NO <sub>3</sub>                            | Berkeleyamide A                                                                                                                           |    |
| A1-8  | C <sub>23</sub> H <sub>24</sub> N <sub>2</sub>                             | 1,3-Dibenzyl-2-phenylimidazolidine                                                                                                        |    |
| A1-9  | C <sub>19</sub> H <sub>21</sub> NO <sub>4</sub>                            | 1-Stepholidine                                                                                                                            |   |
| A1-10 | C <sub>29</sub> H <sub>36</sub> N <sub>4</sub> O <sub>2</sub>              | 4-[2-(4-Methoxyphenyl) phenyl]-N-(3-pyridinylmethyl)-1-piperazinehexanamide                                                               |  |
| A1-11 | C <sub>26</sub> H <sub>38</sub> N <sub>4</sub> O <sub>4</sub>              | Ceanothine C                                                                                                                              |  |
| A1-12 | C <sub>27</sub> H <sub>41</sub> O <sub>6</sub> N                           | Hydrocortamate                                                                                                                            |  |
| A1-13 | C <sub>38</sub> H <sub>54</sub> N <sub>2</sub> O <sub>7</sub>              | tert-butyl N-[6-[4-[[[(4E)-4-(7-methoxy-2,2-dimethyl-3H-chromen-4-ylidene)-2,2-dimethyl-3H-chromen-7-yl]oxy]butanoylamino]hexyl]carbamate |  |
| A26-1 | C <sub>9</sub> H <sub>9</sub> ClO <sub>3</sub>                             | (4-Chloro-2-methylphenoxy)acetic acid                                                                                                     |  |
| A26-2 | C <sub>6</sub> H <sub>12</sub> N <sub>3</sub> PS                           | Thiotepa                                                                                                                                  |  |
| A26-3 | C <sub>9</sub> H <sub>13</sub> NO <sub>3</sub>                             | Epinephrine                                                                                                                               |  |
| A26-4 | C <sub>16</sub> H <sub>11</sub> NO <sub>2</sub>                            | Cinchophen                                                                                                                                |  |

**Figure S3** UPLC-MS/MS diagram of secondary metabolites of *A. alternata* under HHP conditions. With different concentrations of 5-Aza, two strains of *A. alternata* were cultured under the HHP (40 MPa) conditions for 14 days and then cultured in SDB at 28 °C for 10 days. In the figure, (a) represents *A. alternata* CIEL 1, (b) represents *A. alternata* CIEL 26, and (c) represents the possible information of the chemical formula. The X-axis was the retention time (min), and the Y-axis was the relative response (%). The signal peaks with no notable alteration in the sample are marked (red). The TIC of the products produced by the target strains in media containing different concentrations of 5-Aza (the number in the upper right corner of the picture indicates the concentration of 5-Aza) was indicated by different colored lines (black-0  $\mu$ M, red-50  $\mu$ M, green-1000  $\mu$ M, and blue-1000  $\mu$ M).

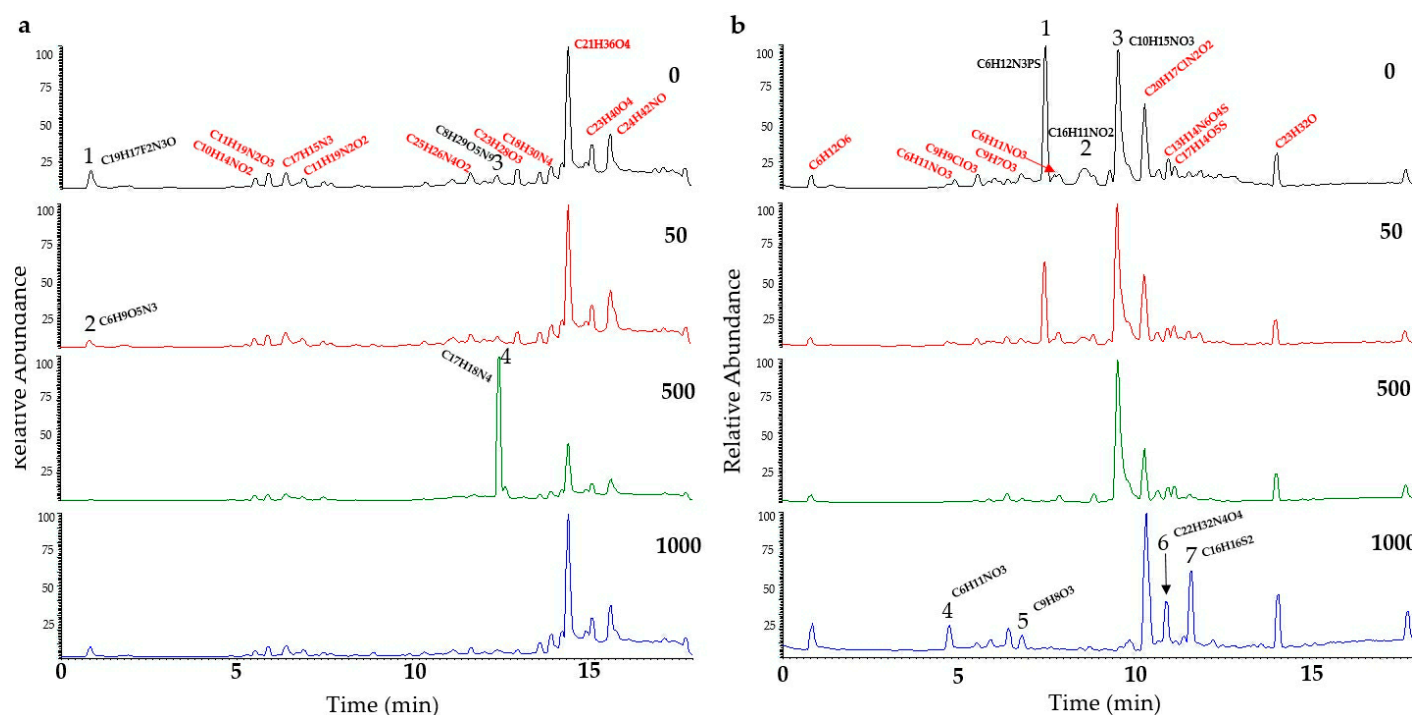

c

| No.      | Chemical formula      | Compound                                                           | Structure                                                                           |
|----------|-----------------------|--------------------------------------------------------------------|-------------------------------------------------------------------------------------|
| A1-40-1  | $C_{19}H_{17}F_2N_3O$ | N-(2,4-difluorophenyl)-1-phenyl-5-propyl-1H-pyrazole-4-carboxamide | 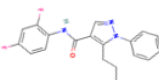 |
| A1-40-2  | $C_6H_9O_5N_3$        | Oxalylalbizziin                                                    |  |
| A1-40-3  | $C_8H_2O_5N_9$        | Not found                                                          |                                                                                     |
| A1-40-4  | $C_{17}H_{18}N_4$     | (6,7,8,9-Tetrahydro-5H-pyrimido[4,5-b]indol-4-yl)-p-tolyl-amine    |  |
| A26-40-1 | $C_6H_{12}N_3PS$      | Thiotepa                                                           |  |
| A26-40-2 | $C_{16}H_{11}NO_2$    | Cinchophen                                                         |  |
| A26-40-3 | $C_{10}H_{15}NO_3$    | Tenuazonic acid                                                    |  |
| A26-40-4 | $C_6H_{11}NO_3$       | 4-Acetamidobutyric acid                                            |  |
| A26-40-5 | $C_9H_8O_3$           | Phenylpyruvic acid                                                 |  |
| A26-40-6 | $C_{22}H_{32}N_4O_4$  | Tonapofylline                                                      |  |
| A26-40-7 | $C_{16}H_{16}S_2$     | Cumyl dithiobenzoate                                               |  |

**Table S1** Table of species information based on ITS gene. ITS gene sequence results were used as identification information to identify 14 strains of sediment-derived fungi isolated and purified from hadal sediments in the Mariana Trench.

| NO. | Name                                   | GenBank accession no. | Fungal genera or species      | Similarity (%) | Depth (m) | Sediment Depth (cm)* |
|-----|----------------------------------------|-----------------------|-------------------------------|----------------|-----------|----------------------|
| 1   | <i>Alternaria alternata</i><br>CIEL 1  | MN822572.1            | <i>Alternaria alternata</i>   | 100            | 5437      | 0-10                 |
| 2   | <i>Cladosporium</i> sp.<br>CIEL 2      | MT636978.1            | <i>Cladosporium</i> sp.       | 100            | 7332      | 0-10                 |
| 3   | <i>Aspergillus</i> sp. CIEL<br>3       | MT549144.1            | <i>Aspergillus</i> sp.        | 100            | 5437      | 10-20                |
| 4   | <i>Arthrinium</i> sp. CIEL<br>4        | KX015984.1            | <i>Arthrinium</i> sp.         | 100            | 6477      | 0-10                 |
| 5   | <i>Stemphylium vesicarium</i> CIEL 5   | KY555005.1            | <i>Stemphylium vesicarium</i> | 100            | 7332      | 0-10                 |
| 6   | <i>Alternaria</i> sp. CIEL<br>6        | KX987252.1            | <i>Alternaria</i> sp.         | 100            | 6477      | 30-40                |
| 7   | <i>Fusarium poae</i> CIEL<br>7         | DQ297556.1            | <i>Fusarium poae</i>          | 100            | 5437      | 10-20                |
| 8   | <i>Cladosporium</i> sp.<br>CIEL 8      | MN220525.1            | <i>Cladosporium</i> sp.       | 100            | 5437      | 10-20                |
| 9   | <i>Arthrinium</i> sp. CIEL<br>20       | MH109527.1            | <i>Arthrinium</i> sp.         | 100            | 7332      | 60-70                |
| 10  | <i>Didymella</i> sp. CIEL<br>21        | MK100198.1            | <i>Didymella</i> sp.          | 100            | 7332      | 60-70                |
| 11  | <i>Alternaria alternata</i><br>CIEL 23 | MT672690.1            | <i>Alternaria alternata</i>   | 100            | 7332      | 60-70                |
| 12  | <i>Alternaria alternata</i><br>CIEL 24 | MT672690.1            | <i>Alternaria alternata</i>   | 100            | 7332      | 60-70                |
| 13  | <i>Alternaria alternata</i><br>CIEL 26 | MT672690.1            | <i>Alternaria alternata</i>   | 100            | 6477      | 30-40                |
| 14  | <i>Preussia</i> sp. CIEL 27            | MK753052.1            | <i>Preussia</i> sp.           | 100            | 6477      | 30-40                |

\* approximate depth, as these samples were from subsampling of box cores

**Table S2** Table of MIC values of fungal secondary metabolites cultured with different epigenetic modifiers for different indicator bacteria. PDA as the base medium, 5-Aza and SAHA as the inhibitors, DMSO as the solvent, and pathogens (*S. aureus*, *E. faecalis*, *C. violaceum*, and *S. choleraesuis*) as indicator bacteria. When the crude extract of the metabolite had no antibacterial effect at a concentration of 512 µg/mL, the crude extract of the metabolite was considered to have no antibacterial activity.

| <i>S. aureus</i>       | 1   | 2 | 3   | 4   | 5   | 6   | 7   | 8 | 20  | 21  | 23  | 24  | 26  | 27  |
|------------------------|-----|---|-----|-----|-----|-----|-----|---|-----|-----|-----|-----|-----|-----|
| PDA                    | -   | / | 256 | 128 | 8   | 128 | 256 | / | -   | -   | 64  | 128 | 32  | -   |
| PDA+DMSO               | -   | / | 256 | 32  | -   | 64  | -   | / | -   | 256 | 256 | 64  | -   | 256 |
| PDA+1 mM 5-Aza         | 32  | / | 256 | 8   | -   | 32  | -   | / | -   | 8   | 128 | 256 | 256 | -   |
| PDA+1 mM SAHA          | 128 | / | 256 | 256 | 256 | 128 | -   | / | -   | 256 | 128 | 128 | -   | -   |
| <i>E. faecalis</i>     | 1   | 2 | 3   | 4   | 5   | 6   | 7   | 8 | 20  | 21  | 23  | 24  | 26  | 27  |
| PDA                    | -   | / | 256 | 8   | -   | 64  | 256 | / | -   | -   | 32  | 128 | -   | -   |
| PDA+DMSO               | -   | / | 256 | -   | -   | 64  | -   | / | -   | -   | 256 | 64  | -   | -   |
| PDA+1 mM 5-Aza         | 8   | / | -   | 128 | -   | 64  | -   | / | -   | 128 | 128 | 128 | 256 | -   |
| PDA+1 mM SAHA          | 8   | / | 256 | 256 | 256 | 64  | -   | / | -   | -   | 32  | 128 | -   | -   |
| <i>C. violaceum</i>    | 1   | 2 | 3   | 4   | 5   | 6   | 7   | 8 | 20  | 21  | 23  | 24  | 26  | 27  |
| PDA                    | 8   | / | 128 | 128 | 8   | 64  | 128 | / | 16  | 64  | 16  | 64  | 16  | 256 |
| PDA+DMSO               | 8   | / | 128 | 32  | 8   | 128 | 128 | / | 16  | 32  | 32  | 32  | 8   | 64  |
| PDA+1 mM 5-Aza         | 8   | / | 128 | 64  | 8   | 64  | 128 | / | 32  | 16  | 32  | 64  | 64  | 64  |
| PDA+1 mM SAHA          | 8   | / | 64  | 64  | 64  | 64  | 128 | / | 64  | 64  | 16  | 64  | 8   | /   |
| <i>S. choleraesuis</i> | 1   | 2 | 3   | 4   | 5   | 6   | 7   | 8 | 20  | 21  | 23  | 24  | 26  | 27  |
| PDA                    | -   | / | 32  | 128 | 32  | 64  | 32  | / | 128 | 256 | 32  | 16  | 16  | 16  |
| PDA+DMSO               | -   | / | 32  | -   | -   | 16  | 256 | / | 32  | 128 | 32  | 8   | -   | 32  |
| PDA+1 mM 5-Aza         | 64  | / | 32  | 256 | -   | -   | 256 | / | 128 | 16  | 32  | 64  | 32  | 64  |
| PDA+1 mM SAHA          | 32  | / | 32  | 128 | 64  | 64  | 128 | / | 32  | 128 | 16  | 64  | -   | 16  |

**Table S3** Table of species information based on PKS gene. PKS sequence results were used as identification information to identify 14 strains of hadal-derived fungi isolated and purified from hadal sediments in the Mariana Trench.

| NO. | Name                                  | GenBank accession<br>no. | Fungal genera<br>or species                   | Similarity<br>(%) | Description                      |
|-----|---------------------------------------|--------------------------|-----------------------------------------------|-------------------|----------------------------------|
| 1   | <i>Alternaria alter-nata</i> CIEL 1   | XP 018388399.1           | <i>Alternaria alter-nata</i>                  | 98.58 %           | Polyketide syn-thase PksJ        |
| 2   | <i>Cladosporium</i> sp.<br>CIEL 2     | KAF2686893.1             | <i>Lentithecium flu-viatile</i> CBS<br>122367 | 44.40 %           | putative PKS                     |
| 3   | <i>Aspergillus</i> sp.<br>CIEL 3      | XM041705781.1            | <i>Aspergillus puulaauensis</i>               | 82.00 %           | type I iterative<br>PKS (PKS10)  |
| 4   | <i>Arthriniump.</i><br>CIEL 4         | KZL78011.1               | <i>Colletotrichum tofieldiae</i>              | 64.44 %           | PKS                              |
| 5   | <i>Stemphylium ves-icarium</i> CIEL 5 | -                        | -                                             | -                 | -                                |
| 6   | <i>Alternaria</i> sp.<br>CIEL 6       | KF887238.1               | <i>Alternaria</i> sp.                         | 97.75 %           | putative, PKS<br>gene parial CDS |
| 7   | <i>Fusarium poae</i><br>CIEL 7        | -                        | -                                             | -                 | -                                |
| 8   | <i>Cladosporium</i> sp.<br>CIEL 8     | PVH82728.1               | <i>Cadophora</i> sp.                          | 44.73 %           | PKS                              |
| 9   | <i>Arthriniump.</i><br>CIEL 20        | -                        | -                                             | -                 | -                                |
| 10  | <i>Didymella</i> sp.<br>CIEL 21       | KAF3039887. 1            | <i>Didymella het-eroderae</i>                 | 87.39 %           | t1PKS                            |
| 11  | <i>Alternaria lter-nata</i> CIEL 23   | XP 018388399.1           | <i>Alternaria alter-nata</i>                  | 98.58 %           | Polyketide syn-thase PksJ        |
| 12  | <i>Alternaria alter-nata</i> CIEL 24  | XM_018528160.1           | <i>Alternaria alter-nata</i>                  | 98.81 %           | Polyketide syn-thase PksJ        |
| 13  | <i>Alternaria alter-nata</i> CIEL 26  | OWY52567.1               | <i>Alternaria alter-nata</i>                  | 98.93 %           | Polyketide syn-thase PksJ        |
| 14  | <i>Preussia</i> sp.<br>CIEL 27        | XP 002151741.1           | <i>Talaromyces marneffe</i>                   | 43.94 %           | putative PKS                     |



**Table S4** Table of the media containing different concentrations of chemical epigenetic modifiers used in this experiment. PDA as the base medium, 5-Aza as the modifier, sterilized water as the solvent, and 0.22  $\mu\text{m}$  filtration membrane were used to filter and remove bacteria.

| NO. | Name                                             | Addreviation                 | Component                                                                                                                                   |
|-----|--------------------------------------------------|------------------------------|---------------------------------------------------------------------------------------------------------------------------------------------|
| 1   | Sabouraud Dextrose Agar                          | SDA                          | glucose 40 g, peptone 10 g, agar 12-15 g, pure water 1 L, natural pH, autoclave (121 $^{\circ}\text{C}$ , 20 min)                           |
| 2   | Sabouraud Dextrose Agar-50 $\mu\text{M}$ 5-Aza   | SDA-50 $\mu\text{M}$ 5-Aza   | glucose 40 g, peptone 10 g, agar 12-15 g, pure water 1 L, natural pH, autoclave (121 $^{\circ}\text{C}$ , 20 min), 50 $\mu\text{M}$ 5-Aza   |
| 3   | Sabouraud Dextrose Agar-500 $\mu\text{M}$ 5-Aza  | SDA-500 $\mu\text{M}$ 5-Aza  | glucose 40 g, peptone 10 g, agar 12-15 g, pure water 1 L, natural pH, autoclave (121 $^{\circ}\text{C}$ , 20 min), 500 $\mu\text{M}$ 5-Aza  |
| 4   | Sabouraud Dextrose Agar-1000 $\mu\text{M}$ 5-Aza | SDA-1000 $\mu\text{M}$ 5-Aza | glucose 40 g, peptone 10 g, agar 12-15 g, pure water 1 L, natural pH, autoclave (121 $^{\circ}\text{C}$ , 20 min), 1000 $\mu\text{M}$ 5-Aza |

**Table S5** List of the PKS gene primers involved in this experiment.

| NO. | ID    | 5'-3'                    | Product<br>length | Domain |
|-----|-------|--------------------------|-------------------|--------|
| 1   | LC1F  | GATCGTTGGATCCTCTA        | 17                | KS     |
| 2   | LC2cR | AGATCTCGAGCTCTAGAAT      | 19                | KS     |
| 3   | GB1   | RTRGAYCCNCAGCAICG        | 17                |        |
| 4   | GB2   | GTRCCGTGNCCNTGV          | 15                |        |
| 5   | KS3   | TTYGAYGCIGCITYTTYAA      | 20                |        |
| 6   | KS4   | RTGRTTIGGCATIGTIATICC    | 21                | KS     |
| 7   | LC1   | GAYCCIMGITYTTYAAYATG     | 21                | KS     |
| 8   | LC2   | GTICIGTICCRTGCATYTC      | 20                |        |
| 9   | LC3   | GCIGARCARATGGAYCCICA     | 20                | KS     |
| 10  | LCS   | GTIGAIGTIGCRTGIGCYTC     | 20                | KS     |
| 11  | KAF1  | GARKSICAYGGIACIGGIAC     | 20                | KS     |
| 12  | KAR1  | CCAYTGIGCICCRTGICCIGARAA | 24                | AT     |
| 13  | KAF2  | GARGCICAYGCIACITCIAC     | 20                | KS     |
| 14  | KAR2  | CCAYTGIGCICCYTGICCIGTRAA | 24                | AT     |

**Table S6** Table of the media containing different chemical epigenetic modifiers used in this study. PDA as the base medium, 5-Aza and SAHA as the inhibitors, DMSO as the solvent, and 0.22  $\mu$ m filtration membrane were used to filter and remove bacteria.

| NO. | Name                               | Addreviation       | Component                                                                                                                                                 |
|-----|------------------------------------|--------------------|-----------------------------------------------------------------------------------------------------------------------------------------------------------|
| 1   | Potato Dextrose<br>Agar            | PDA                | 200 g potato (peeled and cut into small pieces), 1.0% glucose, 1.5-2% agar, deep sea in situ seawater, natural pH, Autoclave (121 °C, 20 min)             |
| 2   | Potato Dextrose<br>Agar-1 mM DMSO  | PDA-1 mM<br>DMSO   | 200 g potato (peeled and cut into small pieces), 1.0% glucose, 1.5-2% agar, deep sea in situ seawater, natural pH, Autoclave (121 °C, 20 min), 1 mM DMSO  |
| 3   | Potato Dextrose<br>Agar-1 mM 5-Aza | PDA-1 mM 5-<br>Aza | 200 g potato (peeled and cut into small pieces), 1.0% glucose, 1.5-2% agar, deep sea in situ seawater, natural pH, Autoclave (121 °C, 20 min), 1 mM 5-Aza |
| 4   | Potato Dextrose<br>Agar-1 mM SAHA  | PDA-1 mM<br>SAHA   | 200 g potato (peeled and cut into small pieces), 1.0% glucose, 1.5-2% agar, deep sea in situ seawater, natural pH, Autoclave (121 °C, 20 min), 1 mM SAHA  |

**Table S7** List of the PKS primers involved in this experiment.

| NO. | ID        | 5'-3'                 | Seq<br>no | length | GC<br>(%) | TM   | Product<br>length |
|-----|-----------|-----------------------|-----------|--------|-----------|------|-------------------|
| 1   | AltqpksF1 | GAAAGCGTCACCCTGAAGTA  | 48        | 20     | 50        | 55.2 | 220               |
| 2   | AltqpksR1 | AAAGGAGGCAGTGGAGCA    | 267       | 18     | 55.6      | 55.9 | 220               |
| 3   | AltqpksR2 | AGCCTCTGCACCAAAAGAG   | 249       | 19     | 52.6      | 55.1 | F1/R2=202         |
| 4   | AltqpksF3 | TAAGGAGCGTACACAGGGATT | 7         | 21     | 47.6      | 56.8 |                   |
| 5   | AltqpksR3 | GTGACCAACATGACCGAGAA  | 215       | 20     | 50        | 55.9 | 209               |

**Table S8** List of the qPCR primers involved in this experiment.

| NO. | ID       | 5'-3'                     | Seq<br>no | length | GC<br>(%) | TM   | PCR<br>TM | Product<br>length |
|-----|----------|---------------------------|-----------|--------|-----------|------|-----------|-------------------|
| 1   | ALTqG1F1 | TTGACGGCAACAACCTGA        | 18        | 131    | 50        | 55.6 | 54        | 177               |
| 2   | ALTqG1R1 | TGACGACCTTCTTGGCTC        | 18        | 307    | 55.6      | 53.3 |           |                   |
| 3   | ALTqG1R2 | TTGACACCCATAAC-<br>GAACAT | 20        | 353    | 40        | 53.3 | 54        | 223               |
| 4   | ALTqG1R3 | GCAGAGGGAG-<br>CAGAAATGA  | 19        | 323    | 52.6      | 55.6 | 55        | 193               |
| 5   | ALTqG1F4 | GGCAAGACCATCCGTTTC        | 18        | 157    | 55.6      | 55.5 | 55        | 169               |
| 6   | ALTqG1R4 | CAGCAGAGGGAG-<br>CAGAAAT  | 19        | 325    | 52.6      | 55   |           |                   |

---

## ITS sequences

### >CIEL-1 *Alternaria alternata*

TTATTGATATGCTTAAGTTCAGCGGGTATCCCTACCTGATCCGAGGTCAAAAGTT-  
GAAAAAAAGGCTTAATGGATGCTAGACCTTTGCTGATAGAGAGTGC GACTTGTGCTGCGCTCCGAAACCAGTAGGCCGGC  
TGCCAATTACTTTAAGGCGAGTCTCCAGCAAAGCTAGAGACAAGACGCCCAACACCAA-  
GCAAAGCTTGAGGGTACAAATGACGCTCGAACAGGCATGCCCTTTGGAATACCAAAGGGCGCAATGTGCGTTCAAAGATT  
CGATGATTCACTGAATTCTGCAATTCACACTACTTATCG-  
CATTTGCTGCGTTCTTCATCGATGCCAGAACCAAGAGATCCGTTGTTGAAAGTTGTAATTATTAATTTGTTACTGACGCTG  
ATTGCAATTACAAAAGGTTTATGTTTGTCTAGTGGTGGGCGAACCCACCAAGGAAACAA-  
GAAGTACGCAAAAGACAAGGGTGAATAATTCAGCAAGGCTGTAACCCCGAGAGGTTCCAGCCCGCCTTCATATTTGTGTA  
ATGATCCCTCCGC

### >CIEL-2 *Cladosporium* sp.

GCGGAGGGATCATTACAAGTTGACCCCGGCCCTCGGGCCGGGATGTTTACAACCCCTTTGTT-  
GTCCGACTCTGTTGCCTCCGGGGCGACCTGCCTCCGGGCGGGGGCCCCGGGTGGACATTTCAAACCTCTTGCCTAACTTTG  
CAGTCTGAGTAAATTTAATTAATAAAATTAACCTTTCAACAACGGATCTCTTGGTTCTGG-  
CATCGATGAAGAACGCAGCGAAATGCGATAAGTAATGTGAATTGCAGAATTCAGTGAATCATCGAATCTTTGAACGCACA  
TTGCGCCCCCTGGTATTCCGGGGGGCATGCCTGTTGAGCGTCATTTACCACTCAA-  
GCCTCGCTTGGTATTGGGCGACGCGGTCCGCCGCGCGCTCAAATCGACCGGCTGGGTCTTTGCTCCCTCAGCGTTGTGG  
AAACTATTGCTAAAGGGTGCCGCGGAGGCCACGCCGTAACCAACCCCATTTCTAAGGTT-  
GACCTCGGATCAGGTAGGGATACCCGCTGAACTTAAGCATA

### >CIEL-3 *Aspergillus* sp.

GTGAATACCTAACACTGTTGCTTCGGCGGGGAACCCCTCGGGGGCGAGCCGCCGGGGAC-  
TACTGAACTTCATGCCTGAGAGTGATGCAGTCTGAGTCTGAATATAAAATCAGTCAAAACTTTCAACAATGGATCTCTTGG  
TTCCGGCATCGATGAAGAACGCAGCGAACTGCGATAAGTAATGTGAATTGCAGAATTCAG-  
TGAATCATCGAGTCTTTGAACGCACATTGCGCCCCCTGGCATTCCGGGGGGCATGCCTGTCCGAGCGTCATTGCTGCCCAT  
CAAGCCCGGCTTGTGTGTTGGGTGCTCGTCCCCCCCCGGGGGAC-  
GGGCCCCGAAAGGCAGCGGCGGCACCGTGTCGGTCTCTGAGCGTATGGGGCTTTGTACCCGCTCGACTAGGGCCGGCCG  
GGCGCCAGCCGACGTCTCCAACCATTTTTCTTCAGGTTGACCTCGGATCAGGTAGGGATACCCGCTGAACTTAAGCATAT

### >CIEL-4 *Arthrinium* sp.

AACCTGCGGAGGGATCATTACAGAGTTATACAACCTCCCATACCATCTGTAAACCTACCCAG-  
TTATGCCTCGGCGTAAGCTCGGTTGGAGGCACCTGCAGTACCCCTGTAGTTGCGGACTGCCAACTCCAGCCGCGGCCCGCC  
GGCGGTACACTAAACTCTGTTTTATTTTATATTCTGAGCGTCTTATTTTAA-  
TAAGTTAAACTTTCAACAACGGATCTCTTGGTTCTGGCATCGATGAAGAACGCAGCGAAATGCGATAAGTAATGTGAAT  
TGCAGAATTCAGTGAATCATCGAATCTTTGAACGCACATTGCGCCCATCAG-  
TATTCTGGTGGGCATGCCTGTTGAGCGTCATTTCAACCCCTAAGCCTAGCTTAGTGTGGGAATCTGCTGTACTGCAGTTC  
CTTAAAGACAGTGGCGGAGCGGCGGTAGTCTCTGAGCGTAGTAATTTATTTCTCGCTTTT-  
GTCAGGCTCTGTCTCCCGCCATAAAACCCCAATTTTTTAGTGGTTGACCTCGGATCAGGTAGGAATACCCGCTGAACTT  
AAGCATATCAATAAGCG

### >CIEL-5 *Stemphylium vesicarium*

---

CAAACACCAAGCAAAGCTGAGGTAACAAATACGCTGAACAGCATGCCCTTTGAATAC-  
CAAAGGCGCAATGGCGTTCAAAGATTCATGATTCACGAATTCTGCAATTCACACTACGTATCGCATTTGCTGCGTTCTTC  
ATCGATGCCAGAACCAAGAGATCCGTTGTGAAAGTGTAAATAATTACATTGTTTACTGAC-  
GCTGATTGCAATCACAAAAAGGTTTATGGTTTGGTCCTGGTGGCGGGCGAACCCGCCAGGAAACAAGACAGTGCGCAA  
AAGACATGGGTGAATAATTACAGACAAGCTGGAGCCCTCAC-  
CGAGGTGAGGTCCCAACCCGCTTTTCATATTGTGTAAAGAACCCCTCCGTAGGTGAACCTGCGGAGGGATCATTACACAA  
TATGAAAGCGGGTTGGGACCTCACCTCGGTGAGGGCTCCAGCTT-  
GTCTGAATTATTCACCCATGTCTTTTGCACACTTCTTGTTCCTGGGCGGGTTCGCCCCGCCACCAGGACCAAACCATAAACC  
TTTTTGTAAATTGCAATCAGCGTCAGTAAACAATGTAATTATTACAACCTTTCAACAAC-  
GGATCTCTTGGTTCTGGCATCGATGAAGAACGCAGCGAAATGCGATACGTAGTGTGAATTGCAGAATTCAGTGAATCATC  
GAATCTTTGAACGCACATTGCGCCCTTTGGTATTCCAAAGGG-  
CATGCCTGTTTCGAGCGTCATTTGTACCCTCAAGCTTTGCTTGGTGTGGGCGTCTTTGTCTCTCACGAGACTCGCCTTAAAT  
GATTGGCAGCCGACCTACTGGTTTCGGAGCGCAGCACAATTCTTGCACTTTGAATCAGCCTT-  
GGTTGAGCATCCATCAAGACCACATTTTCTTAACTTTTGACCTCGGATCAGGTAGGGATACCCGCTGAACTTAAGCATATC  
AATAA

>CIEL-6 *Alternaria* sp.

GGGGTAGGAGCTTCTCCGCTTTTGATATGCTTAAGTTCAGCGGTATCCCTAC-  
CTGATCCGAGGTCAAAAGTTGAAAAAAGGCTTAATGGATGCTAGACCTTTGCTGATAGAGAGTGCGACTTGTGCTGCGC  
TCCGAAACCAGTAGGCCGGCTGCCAATTACTTTAAGGCGAGTCTCCAGCAAAGCTAGAGA-  
CAAGACGCCCAACACCAAGCAAAGCTTGAGGGTACAAATGACGCTCGAACAGGCATGCCCTTTGGAATACCAAAGGGCG  
CAATGTGCGTTCAAAGATTCGATGATTCAGTGAATTCTGCAATTCACACTACTTATCG-  
CATTTGCTGCGTTCTTCATCGATGCCAGAACCAAGAGATCCGTTGTTGAAAGTTGTAATTATTAATTTGTTACTGACGCTG  
ATTGCAATTACAAAAGGTTTATGTTTGTCTAGTGGTGGGCGAACCCACCAAGGAAACAA-  
GAAGTACGCAAAAGACAAGGTGAATAATTACAGCAAGGCTGTAACCCGAGAGGTTCCAGCCCGCCTTCATATTTGTGTA  
ATGATCCCTCCGAGGCCCCCTACGGAAAGGAATCCTTACACAAATTTGAAGGCGGGCTG-  
GAACCTCTCGGGGTACAGCCTTGCTGAATTATGCACCCTTGCTTTTTCGTAATTCTTGTTCCTTGGTGGGTTTCGCCCACC  
ACTAGGACAAACATAAACCTTTTGTAGATTGCAATCAGCGTCAGTAACAAATTAA-  
TAATTACAACCTTTCAACAACGGATCTCTTGTTCTGGCATCGATGAAGAACGCAGCGAAATGCGATAAGTAGTGTGAATTG  
CAGAATTCGGTGAATCATCGAATCTTTGAACGCACATTGCGCACTTTGGTATTCAAAGGG-  
CATGACTGTTTCGAGCGTCATTTGTACCTAAAGCTTTGCTGGATGATGG

>CIEL-7 *Fusarium poae*

GAAATCTCGGTAAAGTACTTCCGTAGGGGGGACCTGCGGAGGGATCATTACCGAG-  
TTTACAACCTCCCAAACCCCTGTGAACATACCATATGTTGCCTCGGCGGATCAGCCCGTCCTTCGGGACGGCCCGCCGAGG  
ACCCTAAACTCTGTTTTTAGTGGAACCTTCTGAGTAAAAAAACAAA-  
TAAATCAAACTTTCAACAACGGATCTCTTGTTCTGGCATCGATGAAGAACGCAGCAAAATGCGATAAGTAATGTGAAT  
TGCAGAATTCAGTGAATCATCGAATCTTTGAACGCACATTGCGCCCGCCAG-  
TATTCTGGCGGGCATGCCTGTTTCGAGCGTCATTTCAACCCTCAAGCCCAGCTTGGTGTGGGAATTGTTTGTACAGAACAT  
TCCCCAAATTGATTGGCGGTCACGTCGAGCTTCCATAGCGTAG-  
TAATTTACACATCGTTACTGGTAATCGTCGCGGCCACGCCGTTAAACCCCAACTTCTGAATGTTGACCTCGGATCAGGTAG  
GAATACCCGCTGAACTTAAGCATATCAAAAGCCGGAGGAA

>CIEL-8 *Cladosporium* sp.

---

ACCTGCGGAGGGATCATTACAAGTGACCCCCGGCTCCGGCCGGGGATGTTTCATAACCCTTT-  
GTTGTCCGACTCTGTTGCCTCCGGGGCGACCCTGCCTTTTCACGGGCGGGGGCCCCGGGTGGACACATCAAAACTCTTGCG  
TAACTTTGCAGTCTGAGTAAATTTAATTAATAAATTAATAAACTTTCAACAACGGATCTCTT-  
GGTTCTGGCATCGATGAAGAACGCAGCGAAATGCGATAAGTAATGTGAATTGCAGAATTCAGTGAATCATCGAATCTTTG  
AACGCACATTGCGCCCCCTGGTATTCCGGGGGGCATGCCTGTTTCGAGCGTCATTTACCAC-  
TCAAGCCTCGCTTGGTATTGGGCGACGCGTCCGCCGCGCGCCTCAAATCGACCGGCTGGGTCTTCTGTCCCCTCAGCGTT  
GTGGAAACTATTTCGCTAAAGGGTGCCACGGGAGGCCAC-  
GCCGAAAAACAAACCCATTTCTAAGGTTGACCTCGGATCAGGTAGGGATACCCGCTGAACTTAAGCATATCA

>CIEL-20 *Arthrimum* sp.

AGTTATACAACTCCCACACCATTGTTAACTTACTCAGTTATGCCTCGGCGTGAAGTGG-  
TACGGAGGCAGGTCGGGTGTTACCCTGTAGCCTACCCTGTAGGTTACCCGGTAGCTACCCTGTAGGTTACCCTGTAGCTTA  
CCCTGCACCACTCCCGCGCAGCCCCGCCGGTGGTACACTAAACTCTT-  
GTTTTATTGTATCTTCTGAGCGTATTATTTAATAATTAATAAACTTTCAACAACGGATCTCTTGGTTCTGGCATCGATGAAGAA  
CGCAGCGAAATGCGATAAGTAATGTGAATTGCAGAATTCAGTGAATCATCGAATCTTTGAAC-  
GCACATTGCGCCCATCAGTATTCTGGTGGGCATGCCTGTTTCGAGCGTCATTTCAACCCTTAAGCCTAGCTTAGTGTTGGGAA  
TCTACTGTACTGTAGTTCCTTAAAGACAGTGGCGGAGCGATAGTTGTCCTCTGAGCGTAG-  
TAAATTTATTTCTCGCTTCTGTAAAGGCTCTGTCTCCCGCCATAAAACCCCAATTTTTTAGTGTTGACCTCGGATCAGGTA  
GGAATACCCGCTGAACTTAAGCATATCAA

>CIEL-21 *Didymella* sp.

GGAAGGATCATTACCTAGAGTTGTAGGCTTGCCTGCTATCTCTTACCCATGTCTTTGAG-  
TACCTTCGTTTCCTCGGCGGGTTCGCCCCGCCGATTGGACAATTTAAACCATTTCAGTTGCAATCAGCGTCTGAAAAAATTT  
AATAAATTACAACTTTCAACAACGGATCTCTTGGTTCTGGCATCGATGAAGAAC-  
GCAGCGAAATGCGATAAGTAGTGTGAATTGCAGAATTCAGTGAATCATCGAATCTTTGAACGCACATTGCGCCCCCTTGGTA  
TTCCATGGGGCATGCCTGTTTCGAGCGTCATTTGTACCTTCAAGCTCTGCTTGGTGTT-  
GGGTGTTTGTCTCGCCTCTGCGCGTAGACTCGCCTCAAAACAATTGGCAGCCGGCGTATTGATTCGGAGCGCAGTACATC  
TCGCGCTTTGCACTCATAACGACGACGTCCAAAAGTACATTTTTTACACTCTTGACCTCG-  
GATCAGGTAGGGATACCCGCTGAACTTAAGCATATCAA

>CIEL-23 *Alternaria alternata*

TGCGGAGGGATCATTACACAAATATGAAGGCGGGCTGGAACCTCTCGGGGTTACAGCCTT-  
GCTGAATTATTCACCCTTGCTTTTTGCGTACTTCTTGTTTCCTTGGTGGGTTGCCCCACCACTAGGACAAACATAAACCTTTT  
GTAATTGCAATCAGCGTCAGTAACAAATTAATAATTACAACTTTCAACAACGGATCTCTT-  
GGTTCTGGCATCGATGAAGAACGCAGCGAAATGCGATAAGTAGTGTGAATTGCAGAATTCAGTGAATCATCGAATCTTTG  
AACGCACATTGCGCCCTTGGTATTCCAAAGGGCATGCCTGTTTCGAGCGTCATTT-  
GTACCCCTCAAGCTTTGCTTGGTGTGGGCGTCTGTCTCTAGCTTTGCTGGAGACTCGCCTTAAAGTAATTGGCAGCCGGCC  
TACTGGTTTCGGAGCGCAGCACAAGTCGCACTCTCTATCAGCAAAGGTCTAGCATCCATTAA-  
GCCTTTTTTTCAACTTTTGACCTCGGATCAGGTAGGGATACCCGCTGAACTTA

>CIEL-24 *Alternaria alternata*

GATCATTACACAAATATGAAGGCGGGCTGGAACCTCTCGGGGTTACAGCCTT-  
GCTGAATTATTCACCCTTGCTTTTTGCGTACTTCTTGTTTCCTTGGTGGGTTGCCCCACCACTAGGACAAACATAAACCTTTT



---

GTAATTGCAATCAGCGTCAGTAACAAATTAATAATTACAACCTTTCAACAACGGATCTCTT-  
GGTTCTGGCATCGATGAAGAACGCAGCGAAATGCGATAAGTAGTGTGAATTGCAGAATTCAGTGAATCATCGAATCTTTG  
AACGCACATTGCGCCCTTTGGTATTCCAAAGGGCATGCCTGTTTCGAGCGTCATTT-  
GTACCCCTCAAGCTTTGCTTGGTGTGGGCGTCTTGCTCTAGCTTTGCTGGAGACTCGCCTTAAAGTAATTGGCAGCCGGCC  
TACTGGTTTCGGAGCGCAGCACAAAGTCGCACTCTCTATCAGCAAAGGTCTAGCATCCATTAA-  
GCCTTTTTTTCAACTTTTGACCTCGGATCAGGTAGGGATACCCGCTGAACTTAAG

>CEIL-26 *Alternaria alternata*

CCTGCGGAGGGATCATTACACAAATATGAAGGCGGGCTGGAACCTCTCGGGGTTACAGCCTT-  
GCTGAATTATTCACCCTTGCTTTTTGCGTACTTCTTGTTTCCTTGGTGGGTTGCCCCACCACTAGGACAAACATAAACCTTTT  
GTAATTGCAATCAGCGTCAGTAACAAATTAATAATTACAACCTTTCAACAACGGATCTCTT-  
GGTTCTGGCATCGATGAAGAACGCAGCGAAATGCGATAAGTAGTGTGAATTGCAGAATTCAGTGAATCATCGAATCTTTG  
AACGCACATTGCGCCCTTTGGTATTCCAAAGGGCATGCCTGTTTCGAGCGTCATTT-  
GTACCCCTCAAGCTTTGCTTGGTGTGGGCGTCTTGCTCTAGCTTTGCTGGAGACTCGCCTTAAAGTAATTGGCAGCCGGCC  
TACTGGTTTCGGAGCGCAGCACAAAGTCGCACTCTCTATCAGCAAAGGTCTAGCATCCATTAA-  
GCCTTTTTTTCAACTTTTGACCTCGGATCAGGTAGGGATACCCGCTGAACTTAAGC

>CIEL-27 *Preussia* sp.

CTGCGGAAGGATCATTATCGTGGGGCTTCGGCCCCGTCGAGATAGCACCTT-  
GCCTTTATGAGTACCTTGTTCCCTCCCCCGTACCTCCGGGGAGCGGGAGGGGCCTCGTCTGTTTCCCCGCGGCGGCGAAA  
GCCCCCGGGGACCACGAAACACGCTGTAACCACCTGTAACCGTCTGA-  
TAAACAAACAAAAAATCAAACTTTCAACAACGGATCTCTTGGTTCTGGCATCGATGAAGAACGCAGCGAAATGCGATA  
AGTAGTGTGAATTGCAGAATTCAGTGAATCATCGAATCTTTGAACGCACATTGCGCCCTT-  
GGTATTCCTTAGGGCATGCCTGTTTCGAGCGTCATTTAAACCTTCAAGCCCTGCTTGGTGTGGGTGCCTGTCCCGCCCCCGC  
GCGTGGACTCACCTCAAATCCATTGGCGGCCCCCGCATGGCCACGAGCGCAGCAGAAAC-  
GCAAACCTCGTGTGCCGACCGGGCGGCTCCCAGAAGCTACACTCACCATTTTGACCTCGGATCAGGTAGGGATACCCGCT  
GAACTTAAGC

---

## PKS sequences (cDNA)

### >CIEL-1 *Alternaria alternata*

GAGGGGCACGGGACGGGACTCCAGTGGGAGATCCTTGCGAAGCTGCAGCTATTAGCAAC-  
GTTTTCTCTTGTGCGACGCCTGAAGACCCGATCTTCGTGGGTGCCCTCAAAAGCAACATGGGTCATCCTGAAGGCGCTAGT  
GGAATCGCGGGTGTGATTAAGACGCTTCTTGTCTAGAGAAGGGCATCATTCCAC-  
CGAATGTATATCCTGAGCGCATCAGCCCGGCTGTTGCGGCGGCTGGCCCCGACTTGAAGTTTCCGCTCGTACCGGCAACCT  
GGCCGACGGATGGTATTGACGCGCGAGTGTAACTCATTTCGGGTATGGAGGCACGAAC-  
GCCCCAGTTGTTCTGGACGATGCGCTGAGCTTTCTTCGTGATCATGGTTTGTCCGGCCAACATTGCACTGAAGTGCTTGACG  
GTAGCAAAGGAGCAGCTGAACCAGCCACCTACGATGGCCTAGCGATCAATAGTGAGGACGG-  
CAGCTATAGCACGGGTACTAACGCATATTCGCAATCCTTTGCAGACGATACGCCACCTGATATCATGGACGACTACGAAA  
CCGCCCCAAAGCTGTTTCGTACTATCCGCATTTGAC-  
GAGCGTGCCGTCCAGCGATCTATCCCCACTTTCGAAAAGTGGTTGTGCAATCATGCGAACGATGAGAATGATCACCGGAT  
TCTTAATGATGTAGCGTACACCTTGGCTGAGAAGCGAACGTCATTTCCATGGAAGACTGCTT-  
GCGTTGCTTTGCCAAATCTGCTCTCGCAACTCTCCTGGTCTACCCCTACGCGAGTCAAACAGCGAGTGAATCTGTGTTTCGT  
CTTCTCCGGCCACGGCGCCCAATGG

### >CIEL-2 *Cladosporium* sp.

GAAGGGCATGGGACGGGACAGTGGCAGGAGACGCAGCCGAGCTAGGTGCCATT-  
GGCGATGCATTCGGGCCATCGCGTCCGATTGACCAACCCCTACTTGTGGCAGCGTCAAAACAAACGTCGGTCACTTAGA  
AGGCACCGCCTCTCTAGCAGGCATCATCAAGGCCATTTTAAGCGTGGA-  
GAAAGGTGTCAATCCGCGGAATCTGAACTTTGAGCGACCAAATCCGAACAACGACCTTGAAAAATACCGCATTTCTGTTC  
CGACTCAGTTGATGCAATGGCCCTTGATGGTGTGAGAAGGGCTAGTGTCAATTGTTTCG-  
GATTCGGCGGAACCATTGCTCACGTGATCCTGGACGACATTGCCAGTTTTGCGAGTGAGAACAAGCTGTCTGCACGTCACG  
TCACAGTGTCCCCGTTTCGAGAGCCACCTCAATGGACATTCAAATATCGATA-  
CATCAATGTCCGGACATGTCGAGTCCGGGAAGAATTCTCTGGCACTGCCTTATCGTTTGCTGGCCCTTTCGGCACCTGAGC  
AAGACGGTGTACAGCGGAATGCGGAGATACTGGCGAAGCATCTTCAAAGATCTCGTT-  
GCCATCTGACAGCTTCCAGGGCAACTCGCCATTGGACGATTCTGCTACACACTAAACCTCCGCAGAACGCATTTCCAATG  
GAGGAGTATCGCAGTGGATCAATCTCAGCTGGGGATGAGCCACTGCCTTTCCAC-  
TCTCCCTCGGGCTAACAAAATCATCGAGGACTGCAAAGTGTGCTTCGTCTTCTCCGGCCATGGCGCCCAATGG

### > CIEL-3 *Aspergillus* sp.

GAGGGGCACGGGACGGGACGCCGTTGGAGATCCTGTGGAGGCGAGGGCTATCAG-  
TGAGGCATTTATCAATTTTCGTCTTCTTCTTCTTCTACGCCGACAGGTCAGATACAATCCACGTCGGGTCTATCAAAACCG  
TCATCGGGCATTTAGAGGGCTGTGCGGGATTAGCGGGCGTGCTGAAGGCCATACAGGC-  
TATTAAGCACAAGATCATCCCTCCAAACCTCCTCTTCAACGAACTGAATCCAGAAATTGAACCGTATTATGGGCCGTTACA  
GATCACGAAAGAACCACTCAGTTGGCCAGAACGGCCAGCAGGTTTAC-  
CGATGCGCGCGAGCGTGAATAGTTTCGGATTTCGGGGGAACCAATGCGCACGCGATTATCGAGAGTTTTGCAGAAGAGAGC  
AACATTAACATTGCGAAAGAACATGTCCCTGAGGAAGAGTTGAG-  
TCCGGCTGTCCCGTTATTCTACTCAGCTCGGTCTGGGTCTGCTGCTGCGTACCATCAAAGCATATATCCAGCATCTGCGG  
CATGACAACCCGTGTATAGATCTTCGCGATCTCAGCTGGATTCTCTACTCGCGCCGCTCCAC-  
GCATCGAATACGAGCTTCTTTTTCTGGAGTATCTCGAGATGCCATCTTGAGAAAAATGGAACGCTACGTCTCGCGCCGTGA  
GGCTGGATACGAACCACCACTGATGAATCAGAGCCCTAGAATTCTAGGAATATTCTCCGGCCACGGCGCCCAAGTGG

---

>CIEL-4 *Arthrinium* sp.

GAATGGCACGGGACGGGGACTCCTATCGGCGATCCTCTCGAAGCGAAGGCCCTGGGAC-  
GTACTTTTGGAAATGCAAGACAGAGCGGCGATTCCGTATATATCGGATCTCTGAAGTCCAATATAGGGCATCTGGAAGGT  
GGATCTGGCACAGCCCAGGTGATCAAAGCAATCTTCATGCTGGAG-  
CAGGGACAAATTCCCCCTTCCCTCTACTACGAAAAGCCCAATCCCCATATCCCGATGGACGACTGGAACCTCCGAGTACC  
TACAGAACTCACTCCCTGGCCTGCCGATGGCCTCCGTCGTATTAGCATCAACTCTTTTGGC-  
TATGGAGGTACGAACGCTCACTGCATTCTTGATGATGCTTACCACTACCTTAAGGAGAGACGACTAGCTGGAAATCACAA  
TGTGAAAGTCGCAGACGGGTCGTCCCCTGCGATCTCTGAA-  
GACTCAGGGGTGTCTCTCAGCGAGCCGATTGGCCCCCTTACGCTAAGAAATACTGATACTGAGAGCGAGACGGAGCCCCGA  
CAAAGCAATGGCGCTATTTCCCTCGTCTTCTGATTTGGAGCTCCAATGAGAAGGAAGGCG-  
TATACCGAACGTGTGCTGCTCATGCATCCTATCTCAAATCGAAGTTTGCTGAGCTGGAGGCCAAGCATAAATCGGAAGTTT  
TCAGCAAACCTTATACGCACACTTCATGCTCGACGAAGCCGATTGCCGTG-  
GAAGTCCTTCTCGATCGTCAATTCTCTTAATGTGGTCGGGACTCTCGAGGGTTCAATTGTGGAACCGGTGCGTTCGAGTGGC  
GAGAAACCACTCTAATCTTCATCTTTTCCGGCCACGGCGCCCAGTGG

>CIEL-6 *Alternaria* sp.

GAGGCGCATGGGACGGGGACTCCAGTGGGAGATCCTTGCGAAGCTGCAGCTATTAGGCAAC-  
GTTTTCTCTTGTCGGACGCCTGAAGACCCGATCTTCGTGGGTGCCCTCAAAAAGCAACATGGGTCATCCTGAAGGCGCTAG  
TGGAATCGCGGGTGTGATTAAGACGCTTCTTGTCTAGAGAAGGGCATCATTCCAC-  
CGAATGTATATCCTGAGCGCATCAGCCCCGGCTGTTGCGGCGGCTGGCCCCAACTTGAAGTTTCCGCTCGTACCGGCAACCT  
GGCCGACGGATGGTATTCGACGCGCGAGTGTGAACTCATTCCGGGTATGGAGGCACGAAC-  
GCCCCAGTTGTTCTGGACGATGCGCTGAGCTTTCTTCGTGATCATGGTTTGTCCGGCCAACATTGCACTGAAGTGCTTGACG  
GTAGCAAAGGAGCAGCTGAACCAGCCACCTACGATGGCCTAGCGATCAATAGTGAGGACGG-  
CAGCTATAGCACGGGTACTAACGCATATTCGCAATCCTTTGCAGACGATACGCCACCTGATATCATGGACGACTACGAAA  
CCGCCCCAAAGCTGTTTCGTACTATCCGCATTTGAC-  
GAGCGTGCCGTCCAGCGATCTATCCCCACTTTCGAAAAGTGGTCGTGCAATCATGCGAACGATGAGAATGATCACCGGAT  
TCTTAATGATGTAGCGTACACCTTGGCTGAGAAGCGAACGTCATTTCCATGGAAGACTGCTT-  
GCGTTGCTTTGCCAAATCTGCTCTCGCAACTCTCCTGGTCTACCCCTACGCGAGTCAAACAGCGAGTGAATCTGTGTTTCGT  
CTTCTCCGGCCACGGCGCCCAATGG

>CIEL-8 *Cladosporium* sp.

GAAGGGCACGGGACGGGGACTGTTGCGGGAGATGCCGCAGAGCTCGGCGCGATCGGAGAC-  
GCCTTTGGTGCAACACGACTTTCCGACCAGCCTTTGAATGTGGGAAGCGTGAAGACCAACGTTGGCCATCTCGAGGGAAC  
AGCTTCCCTGGCCGGCATCATCAGGGCTGTCTCAGCTTGGAAGGGGTGTCAT-  
ACCCCAGAACTTGAATTCGAGCGACCGAATCCGAAGAACGATCTCGAAAAGTATAGGATTACCGTTCCGACTAATCTAA  
CGAAGTGGCCTTTACAAGGAGTCAGGAGAGCCAGCATCAACTGCTTTGGATTCCGTGGAAC-  
GATCGCTCATGTATCTTGATGATGCGGAGAGCTTTTGACCGAGCGAATGCTATTTGCGAATCATGTTACGGGCTCTCCG  
ATCTCAAACGGCGGACTAAGTGGCATCATGGTAGATGACAGCACCAATTCGCGATCCG-  
CATTTCTGCCATACCGTTTACTCGCATTGTCTTACCCGAGCAGGATGGCGTCAAACGAAATGCGAACGCACTAGCCGATT  
ACAATGCTACGAAGACCGATTGCAATGGAGACACGGGAAATTCATATCTAGACGATCTCTGC-  
TACACGTTCAACCTTCGCAGAACGCAATTTCCATGGAGACAAGCCGTTGCTGTACAGACAGCAACCGACGTCAGCGAGCA  
GCTTGACGTCTTACCCAAGGCTTCGAAGGCCATCGAGGACTGCAGGGCTT-  
GCTTCGTCTTCTCCGGCCATGGCGCCCAGTGG

---

>CIEL-21 *Didymella* sp.

GAGTGGCATGGGACGGGGACCCGTGTTGGTGACCCAATTGAGATTGGTGCGATTCAAAGAG-  
TTTTCGGAGACGGGAGGACCAAACGCAAGCCCCCTCTATATCGGGTCTGTCAAATCTAACATTGGTCACCTGGAAGCAGCG  
GCTGGTAAGTTCTGACTAATTGAGCTTCTCGAGAGCCTCGAGAAGCCCTCG-  
CATGTGTTTCTCGAGCTAACGTTTTTCAGGCATCGCAGGAGTGATCAAGACTGCGCTAATGTTGGAGCGTGGATTTATCCTCC  
CAAACATGACTTCAAATATCCGAACGAAAATATCCCCTTTGACCAGTGGGGCCTAAAGGTT-  
GCGACTCGTCAACAGCCCTGGCCTTTTGGCAAGCTTTGGGCCAGTGTCATGGCTTTGGGTTTGGAGGAACTAACGGACAT  
GTTGTGGCAAGTTTCCCAGTTCTATTCTATTGTTGAAGTTGCGTATGCTAACCGCCGCTTTT-  
GTCGTATAGATGACTAGAGGTCCATTGGAACGTAAGACGATGAAGGAAGAAGTTGACACCCAAACTTGCGAGCGTTTGT  
CATTCTATCCGCGAACGATAAATCGAGTGCCGAGAAGACGATGCAAAACCTTGG-  
TATCTATCTCGAGCAGCGTCCAGAGATCTTTCAGAACGGTCTCTTGAGCAATCTCGTTACACATTGGGACAGCGGAAGTC  
TGTTTCATCCATGGCGCATTGCTGTATCCGCGTCTCCAGTGCAGAGTTGGTCGAAACCTT-  
GTCTAGTGGTAGGATTAGTCCCATCAAGCAAGACGCTGATACACCACGTTTGGCATGGATCTTCTCCGGCCATGGCGCCCA  
ATGG

>CIEL-23 *Alternaria alternata*

GAGGGGCATGGGACGGGGACTCCAGTGGGAGATCCTTGCGAAGCTGCAGCTATTAGCAAC-  
GTTTTCTCTTGTCGGACGCCTGAAGACCTGATCTTCGTGGGTGCCCTCAAAGCAACATGGGTCATCCTGAAGGCGTAGT  
GGAATCGCGGGTGTGATTAAGACGCTTCTTGTCTAGAGAAGGGCATCATTCCAC-  
CGAATGTATATCCTGAGCGCATCAGCCCCGGCTGTTGCGGCGGCTGGCCCCAACTTGAAGTTTCCGCTCGTACCGGCAACCT  
GGCCGACGGATGGTATTCGACGCGCGAGTGTGAACTCATTGCGGTATGGAGGCACGAAC-  
GCCCCAGTTGTTCTGGACGATGCGCTGAGCTTTCTTCGTGATCATGGTTTGTCCGGCCAACATTGCACTGAAGTGCTTGACG  
GTAGCAAAGGAGCAGCTGAACCAGCCACCTACGATGGCCTAGCGATCAATAGTGAGGACGG-  
CAGCTATAGCACGGGTACTAACGCATATTGCAATCCTTTGCAGACGATACGCCACCTGATATCATGGACGGCTACGAAA  
CCGCCCCAAAGCTGTTCTGTAATCCGCATTTGAC-  
GAGCGTGCCGTCCAGCGATCTATCCCCACTTTCGAAAAGTGTTGTGCAATCATGCGAACGATGAGAATGATCACCGGAT  
TCTTAATGATGTAGCGTACACCTTGGCTGAGAAGCGAACGTCATTTCCATGGAAGACTGCTT-  
GCGTTGCTTTGCCAAATCTGCTCTCGCAACTCTCCTGGTCTACCCCTACGCGAGTCAAACAGCGAGTGAATCTGTGTTTCGT  
CTTCTCCGGCCATGGCGCCCAATGG

>CIEL-24 *Alternaria alternata*

CCATTGGGCGCCGTGGCCGGAGAAGACGAAACACAGATTCACCTCGCTGTTTGACTCGCG-  
TAGGGGTAGACCAGGAGAGTTGCGAGAGCAGATTTGGCAAAGCAACGCAAGCAGTCTTCCATGGAAATGACGTTGCTTC  
TCAGCCAAGGTGTACGCTACATCATTAGAATCCGGTGATCATTCTCATCGTTTCG-  
CATGATTGCACAACCACTTTTCGAAAGTGGGGATAGATCGCTGGACGGCACGCTCGTCAAATGCGGATAGTACGAACAGC  
TTTGGGGCGGTTTCGTAGTCGTCCATGATATCAGGTGGCGTATCGTCTG-  
CAAAGGATTGCGAATATGCGTTAGTACCCGTGCTATAGCTGCCGTCTCACTATTGATCGCTAGGCCATCGTAGGTGGCTG  
GTTACAGCTGCTCCTTTGCTACCGTCAAGCACTTCAGTGCAATGTTGGCCGGACAAAC-  
CATGATCACGAAGAAAGCTCAGCGCATCGTCCAGAACAACGTGGGCGTTTCGTGCCTCCATACCCGAATGAGTTCACACTC  
GCGCGTCGAATACCATCCGTGCGCCAGGTTGCCGCTACGAGCGGAAACTTCAAGTT-  
GGGGCCAGCCGCCGCAACAGCCGGGCTGATGCGCTCAGGATATACATTGCGTGGAATGATGCCCTTCTCTAGAACAAGAA  
GCGTCTTAATCACACCCGCGATTCCACTAGCGCCTTCAGGATGACCCATGTTGCTTTT-  
GAGGGCACCCACGAAGATCGGGTCTTCAGGCGTCCGACAAGAGAAAACGTTGCTAATAGCTGCAGCTTCGCAAGGATCTC  
CCACTGGAGTCCCCGTCCCCGTGCGCCTC

---

>CIEL-26 *Alternaria alternata*

GAGTGGCATGGGACGGGGACTCCAGTGGGAGATCCTTGCGAAGCTGCAGCTATCAG-  
CAATGTTTTCTCTTGTGCGACGCCCCGAAGACCCGATCTTCGTGGGTGCCCTCAAAAGCAACATGGGTCATCCTGAAGGCGC  
TAGTGGAATCGCGGGTGTGATTAAGACGCTTCTTGTCTAGAGAAGGGCATCATTCCAC-  
CGAATGTATATCCTGAGCGCATCAGCCCCGGCTGTTGCGGCGGCTGGTCCCAACTGAAGTTTCCGCTCGTACCGGCAACCT  
GGCCGACGGATGGTATTCGACGCGGAGTGTGAACTCATTGCGGTATGGAGGCACGAAC-  
GCCCCACGTCGTTCTGGACGATGCGCTGAGCTTTCTTCGTGATCATGGTTTGTCCGGCCAACATTGCACTGAAGTGCTTGACG  
GTAGCAAAGGAACAGCTGAACCAGCTACCTACGATGGCTTAGCGATCAATAGTGATGAC-  
GACAGCTATAGCACGGGTACTAACGCATGTTGCGAAACCTTTGCAGACGATACGCCACCTGATATCATGGACGACTACGA  
AACC GCCCAAAGCTGTTCTGTA CTATCCGCATTTGAC-  
GAGCGTGCCGTCCAGCGATCTATCTCCACTTTGAAAAGTGGCTGCGCAATCATGCGAACGATGAGAATGATCACCGGAT  
TCTTAATGATGTAGCGTACACCTTGGCTGAGAAGCGAACGTCATTTCCATGGAAGACTGCTT-  
GCGTTGCTTTGCCAAATCTGCTCTCGCAACTCTCCTGGTATACCCCTACGCGAGCCAAACAGCGAGTGAATCTGTGTTTCGT  
CTTCTCCGGCCACGGCGCCCACTGG

>CIEL-27 *Preussia* sp.

GGGCATGGGACGGGGACGCGAGGCTGGTACGTCGTTTACCCTTGGCG-  
CAGAAAATTTTTCTGACTCACCTGACTAGGTGACAACGCCGAAATCAACTCGATTTCCGAGGTATTTTGGGCCAAGGAC  
GTGAACGGGATCTTTATGTAGGCTCAGTCAAAGCCAACATCGGCCACTTGGAAGCCG-  
CAAGTGGCGTGGCTGGACTGATCAAGGTGGTTATGATGCTCAAGAAGGACCAAATACCGCCTCATATTGATCTTGTAGAA  
CCCAAGCCAACACTTAGGCTTGAAGAGAGAGGAATAAAGGTAAGCATGTCTCCTCGCAG-  
TTCAATGCTGTTTTGCTTTACTAATGTTTTGAGCTAGATCGCGCAGGAACCCACGAGTCTGACTCCGAGTGACCATATAGGT  
CCTCGCAGGGTATCACTGAACTCATTGCGATATGGCGGTACTA-  
ACTGTCATCTCATTCTCGAGGGATATGATGCGTCGCAGCCTAAAGCAACGCTTTCGAATGGCGAGATTTCTGAAGGTTGGC  
TTTCACGGAAACCGCTTCTGAACCACTGCTCCCGTTTCCACTGACCGCTGCTTCTGA-  
GACTGCCCTTCAGGCAACTTGCAAGCGCCTTAGCCAATGGATTGTGGACACGAGACCGTCTGAATCCGAACTCCGCGATC  
TTGCGCACACACTTGGAAGTCGCCGCTCCCACTTACCATGTGCGAA-  
GAACTGTTCTGGCTTCCACGATCGAGGAACTACAGGCAGAGCTCACAGCCGAAAAAGCACTAGTTGTCAAGGCCGGCTCG  
TCTCCGAAAATGACCATGGCTTTTTCCGGCCATGGCGCCCACTGGA
